# Supplementary material for: Analysis of the Gut Microbiota: An Emerging Source of Biomarkers for Immune Checkpoint Blockade Therapy in Non-Small Cell Lung Cancer
Source: MDPI journal article supplement (doi:10.3390/cancers13112514), 2021-05-21
Supplement: s1 [file s1]

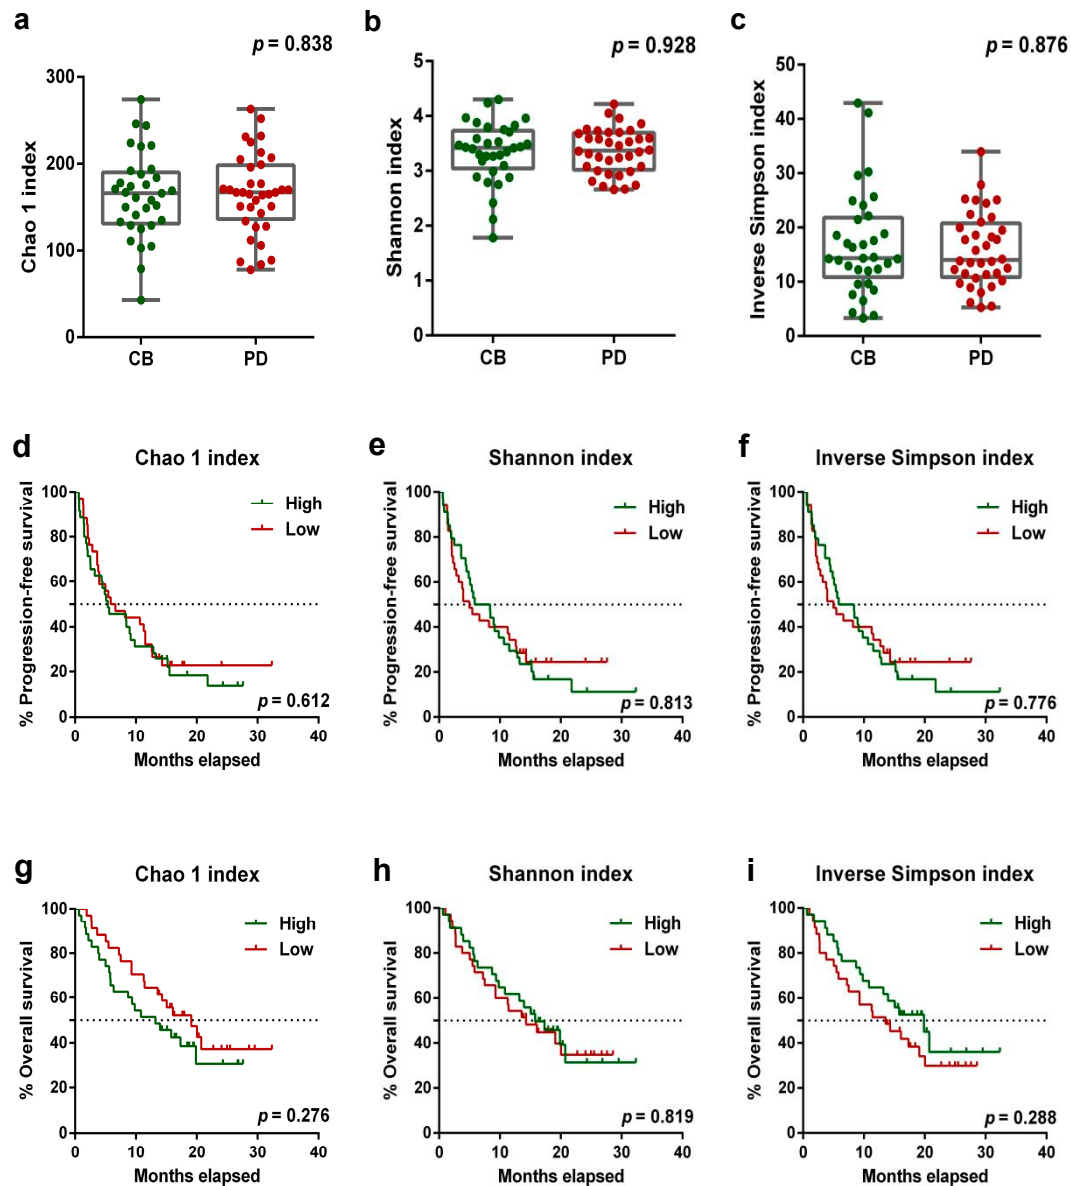

**Figure S3. Correlation analysis between alpha-diversity and clinical outcomes.** (a) Chao 1, (b) Shannon and (c) inverse Simpson indices scores of the gut microbiota in patients stratified according to response to ICB. CB: clinical benefit; PD: progression disease. Statistical analysis was performed using the Mann-Whitney  $U$  rank sum test. Error bars represent the distribution of alpha-diversity scores. (d-f) Kaplan-Meier plot of progression-free survival in patients with high or low alpha-diversity indices. (g-i) Kaplan-Meier plot of overall survival in patients with high or low alpha-diversity indices. Cutoff values correspond to the median of index scores: 167 (Chao 1 index), 3.4

(Shannon index) and 14.25 (inverse Simpson index). Statistical analysis was performed using the log-rank test.
