# Supplementary material for: Analysis of the Gut Microbiota: An Emerging Source of Biomarkers for Immune Checkpoint Blockade Therapy in Non-Small Cell Lung Cancer
Source: MDPI journal article supplement (doi:10.3390/cancers13112514), 2021-05-21
Supplement: s1 [file s1]

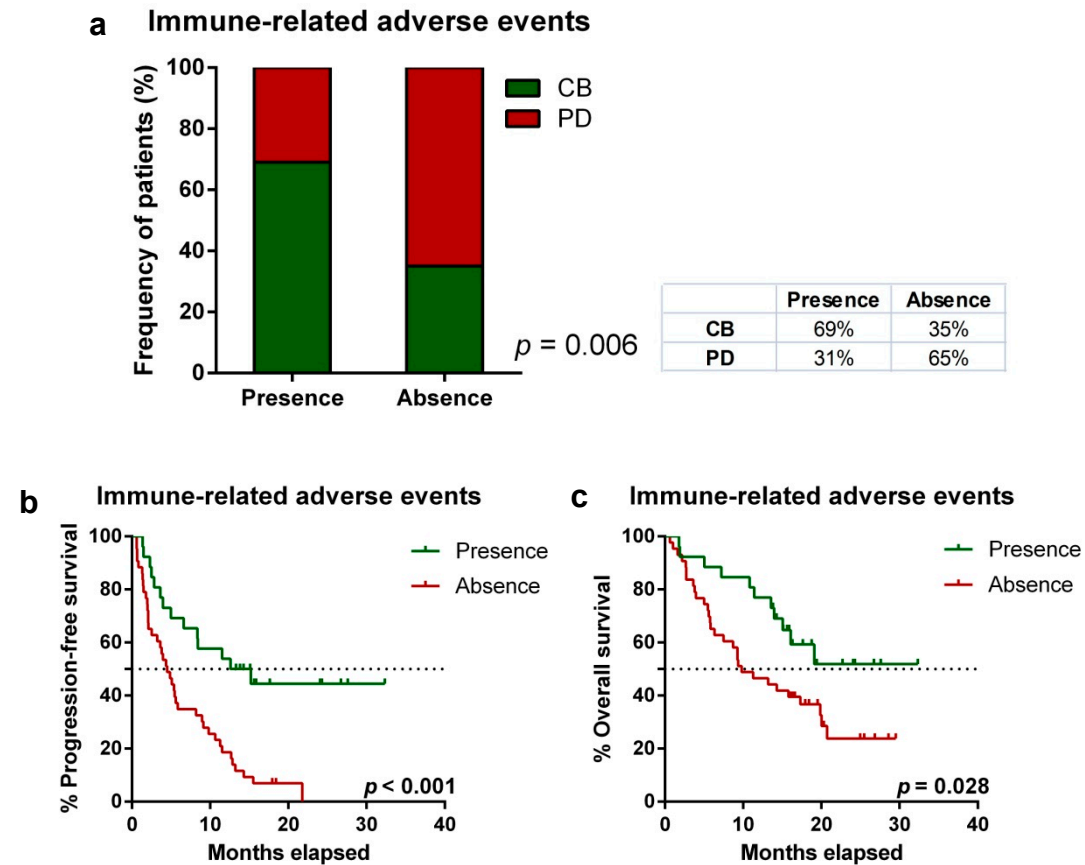

**Figure S1. Correlation analysis between immune-related adverse events and clinical outcomes.** (a) Frequency of patients stratified by presence/absence of immune-related adverse events according to response to ICB (CB and PD groups). Statistical analysis was performed using the Chi-squared test. (b) Kaplan-Meier plot of progression-free survival in patients stratified by presence/absence of immune-related adverse events. (c) Kaplan-Meier plot of overall survival in patients stratified by presence/absence of immune-related adverse events. CB: clinical benefit group; PD: progression disease group. Statistical analysis was performed using the log-rank test.
