# Supplementary material for: Analysis of the Gut Microbiota: An Emerging Source of Biomarkers for Immune Checkpoint Blockade Therapy in Non-Small Cell Lung Cancer
Source: MDPI journal article supplement (doi:10.3390/cancers13112514), 2021-05-21
Supplement: s1 [file s1]

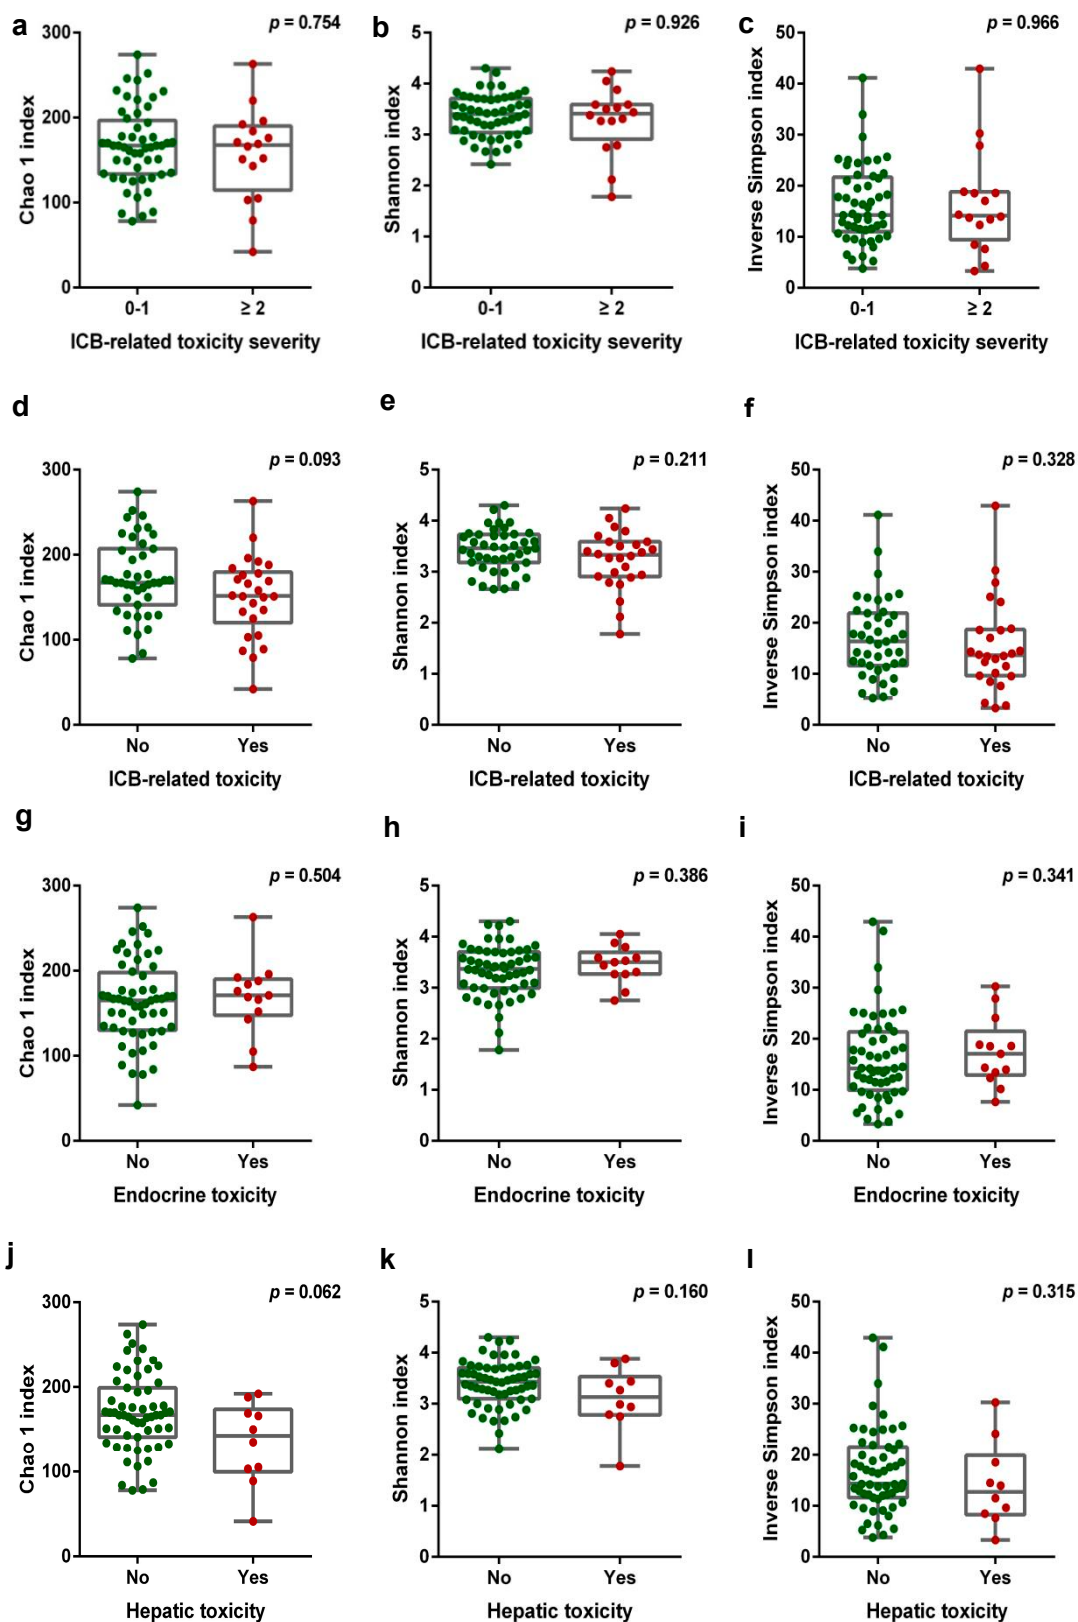

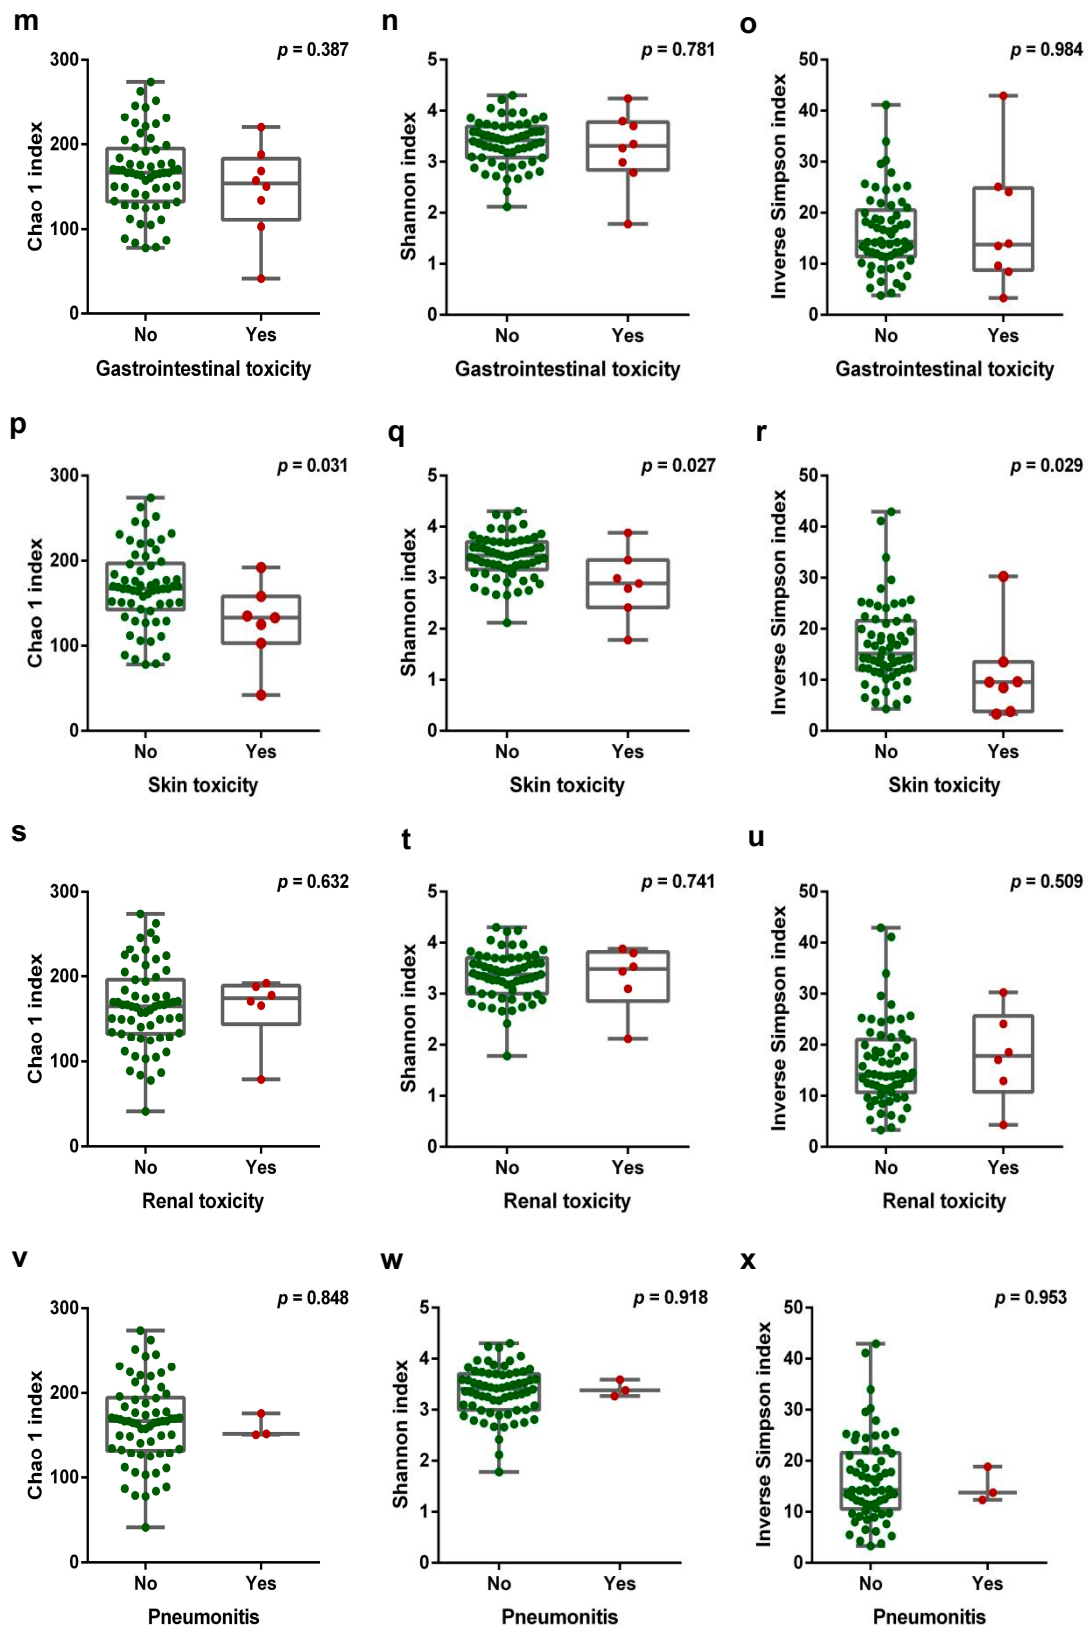

**Figure S2. Correlation analysis between alpha-diversity and immune-related adverse events.** (a-c) Alpha-diversity indices scores of the gut microbiota in patients stratified according to immune checkpoint blockade (ICB)-related toxicity severity. (d-f) Alpha-diversity indices scores of the gut microbiota in patients stratified by presence/absence of ICB-related toxicity. (g-i) Alpha-diversity indices scores of the gut microbiota in patients stratified by presence/absence of endocrine toxicity. (j-l) Alpha-diversity indices scores of the gut microbiota in patients stratified by presence/absence of hepatic toxicity. (m-o) Alpha-diversity indices scores of the gut microbiota in patients stratified by presence/absence of gastrointestinal toxicity. (p-r) Alpha-diversity indices scores of the gut microbiota in patients stratified by presence/absence of skin toxicity. (s-u) Alpha-diversity indices scores of the gut microbiota in patients stratified by presence/absence of renal toxicity. (v-x) Alpha-diversity indices scores of the gut microbiota in patients stratified by presence/absence of pulmonary toxicity (pneumonitis). Statistical analysis was performed using the Mann-Whitney *U* rank sum test. Error bars represent the distribution of alpha-diversity scores.
