# Supplementary material for: Analysis of the Gut Microbiota: An Emerging Source of Biomarkers for Immune Checkpoint Blockade Therapy in Non-Small Cell Lung Cancer
Source: MDPI journal article supplement (doi:10.3390/cancers13112514), 2021-05-21
Supplement: s1 [file s1]

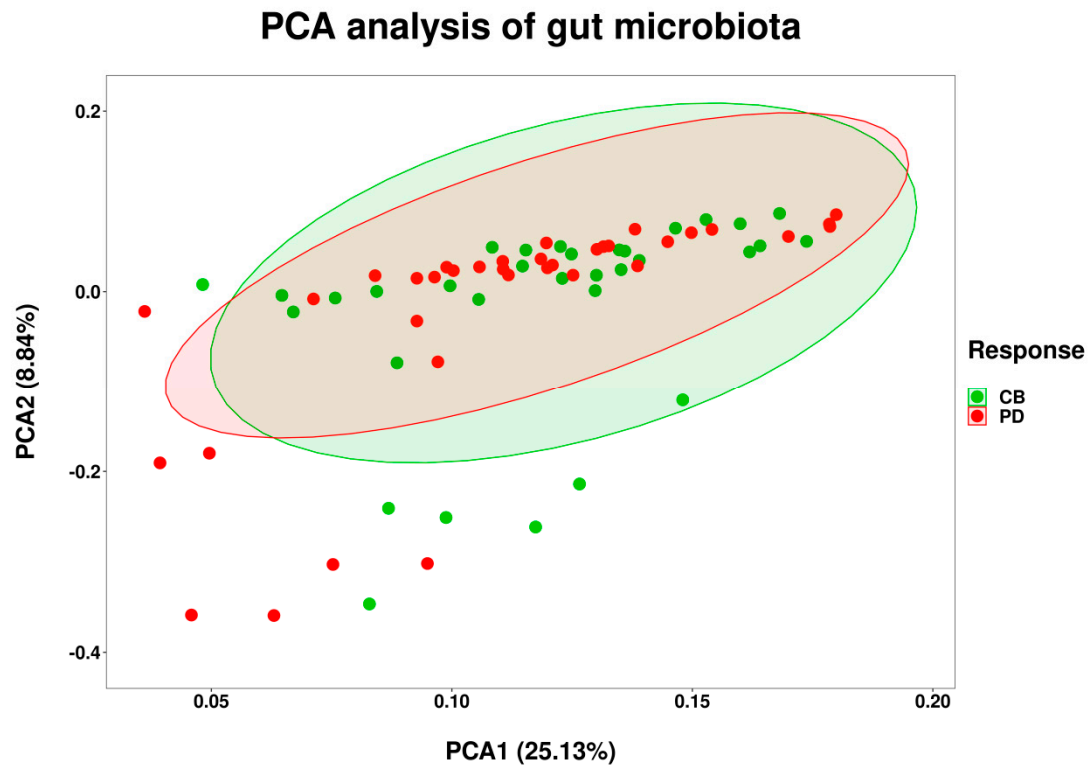

**Figure S5. Principal component analysis (PCA) plot of the gut microbiota composition in CB and PD groups.** PERMANOVA with “ADONIS” was performed to investigate the significance between the tested groups,  $p = 0.184$ . CB (green): clinical benefit group; PD (red): progression disease group.
