# Supplementary material for: Analysis of the Gut Microbiota: An Emerging Source of Biomarkers for Immune Checkpoint Blockade Therapy in Non-Small Cell Lung Cancer
Source: MDPI journal article supplement (doi:10.3390/cancers13112514), 2021-05-21
Supplement: s1 [file s1]

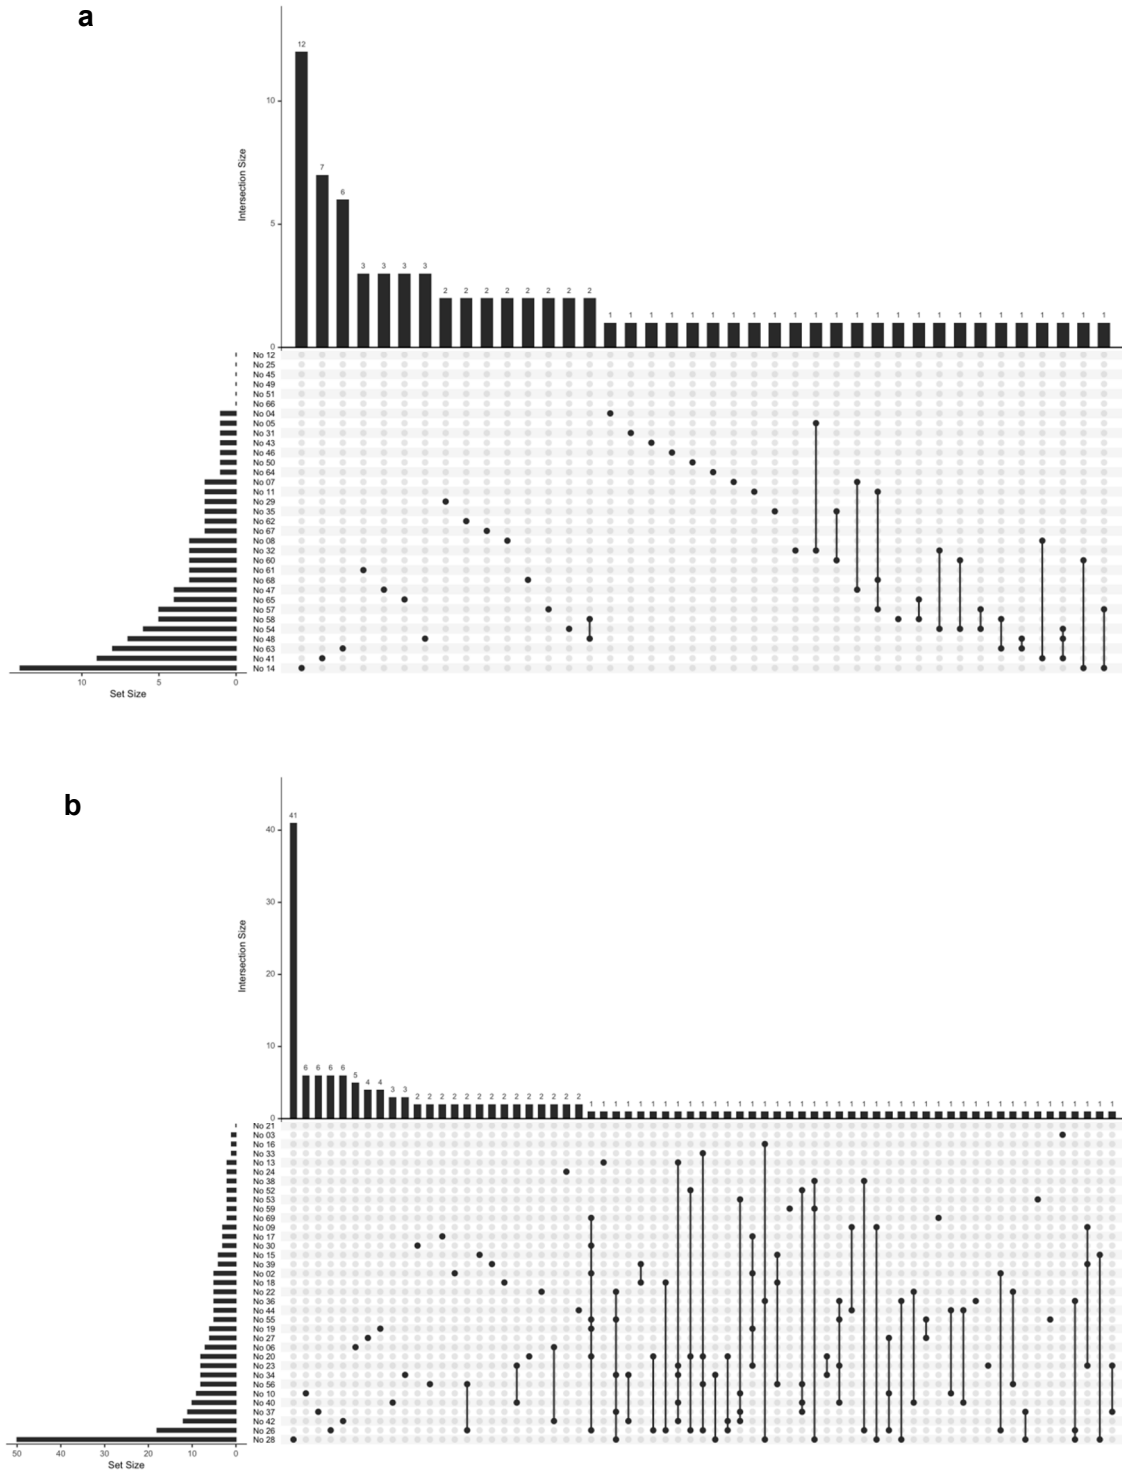

**Figure S4. UpSet plots illustrating quantitative intersection of the exclusive taxa for CB (a) and PD (b) patients.** The numbers above the bars show the number of common taxa between the groups of samples marked below the bars. Empty (light-gray) circles indicate samples without detected taxa, dark circles indicate samples with detected taxa and connecting bar

indicate multiple overlapping samples. CB: clinical benefit group; PD: progression disease group.
