# Supplementary material for: Analysis of the Gut Microbiota: An Emerging Source of Biomarkers for Immune Checkpoint Blockade Therapy in Non-Small Cell Lung Cancer
Source: Cancers (Basel). 2021 May 21;13(11):2514. doi: 10.3390/cancers13112514 (PMC8196639; doi:10.3390/cancers13112514)
Supplement: Supplementary file 1 [file cancers-13-02514-s001.zip › Table S1.xlsx]

## Sheet: Table S1
Table S1. Detailed clinico-pathological characteristics of 69 advanced NSCLC patients in the study.
Patient ID	Age	Sex	Smoking status	Body mass index	Antibiotics previous	ECOG performance status	Histologic subtype	Stage prior to immunotherapy	Tumor size (cm)	Number of metastatic localizations	PD-L1 TPS	Treatment	Line of immunotherapy	ICB-related toxicity (grade)	ICB-related endocrine toxicity (grade)	ICB-related hepatotoxicity (grade)	ICB-related gastrointestinal toxicity (grade)	ICB-related skin toxicity (grade)	ICB-related renal toxicity (grade)	ICB-related pneumonitis (grade)	Response evaluation	Progression-free survival (months)	Overall survival (months)
No.01	63	Female	Smoker	≥ 25	No	1	Adenocarcinoma	IV	> 5	≥ 2	≥ 50%	Pembrolizumab	First-line	Yes (grade 1)	Yes (grade 1)	No	No	No	No	No	PD	1.37*	1.9*
No.02	61	Female	Smoker	< 25	No	1	Squamous-cell carcinoma	III	> 5	< 2	< 1%	Atezolizumab	Second-line	Yes (grade 1)	No	No	Yes (grade 1)	No	No	No	PD	3.63*	15.07*
No.03	70	Male	Smoker	≥ 25	No	1	Squamous-cell carcinoma	IV	> 5	≥ 2	< 1%	Nivolumab	Second-line	Yes (grade 2)	No	No	No	No	No	Yes (grade 2)	PD	4.97*	7.2*
No.04	68	Male	Smoker	< 25	No	0	Squamous-cell carcinoma	III	> 5	< 2	≥ 50%	Nivolumab	Second-line	No	No	No	No	No	No	No	CB	14.3*	20.03*
No.05	73	Male	Non-smoker	< 25	No	1	Adenocarcinoma	III	> 5	< 2	1%-49%	Nivolumab	Second-line	Yes (grade 2)	Yes (grade 2)	No	No	No	No	Yes (grade 2)	CB	32.3333	32.3333
No.06	73	Male	Smoker	< 25	No	1	Squamous-cell carcinoma	IV	> 5	≥ 2	≥ 50%	Nivolumab	Second-line	No	No	No	No	No	No	No	PD	5.6*	5.6*
No.07	67	Male	Smoker	< 25	No	1	Adenocarcinoma	III	> 5	< 2	≥ 50%	Pembrolizumab	First-line	No	No	No	No	No	No	No	CB	12.7*	28.57
No.08	39	Male	Smoker	≥ 25	No	1	Adenocarcinoma	IV	≤ 5	≥ 2	< 1%	Nivolumab	Second-line	No	No	No	No	No	No	No	CB	11.53*	29.5
No.09	55	Male	Non-smoker	< 25	Yes (Levofloxacin)	2	Adenocarcinoma	IV	> 5	≥ 2	NA	Nivolumab	Second-line	No	No	No	No	No	No	No	PD	4.37*	5.77*
No.10	65	Male	Smoker	< 25	No	1	Adenocarcinoma	IV	> 5	≥ 2	< 1%	Atezolizumab	Second-line	No	No	No	No	No	No	No	PD	0.67*	1.63*
No.11	52	Male	Smoker	≥ 25	No	0	Squamous-cell carcinoma	IV	> 5	< 2	< 1%	Nivolumab	Second-line	Yes (grade 1)	No	No	No	No	Yes (grade 1)	No	CB	26.73	26.73
No.12	52	Female	Smoker	≥ 25	No	0	Poorly differentiated carcinoma	IV	> 5	≥ 2	≥ 50%	Pembrolizumab	First-line	Yes (grade 2)	Yes (grade 2)	Yes (grade 2)	Yes (grade 2)	No	No	No	CB	27.6	27.6
No.13	65	Female	Smoker	≥ 25	No	0	Squamous-cell carcinoma	IV	≤ 5	< 2	< 1%	Nivolumab	Second-line	No	No	No	No	No	No	No	PD	1.37*	7.5*
No.14	57	Male	Smoker	< 25	No	1	Squamous-cell carcinoma	IV	≤ 5	< 2	< 1%	Atezolizumab	Second-line	No	No	No	No	No	No	No	CB	21.77*	26.8333
No.15	69	Male	Non-smoker	≥ 25	Yes (Azithromycin)	1	Adenocarcinoma	IV	> 5	< 2	< 1%	Atezolizumab	Second-line	No	No	No	No	No	No	No	PD	1.3*	14.3*
No.16	51	Female	Smoker	< 25	No	0	Large-cell lung carcinoma	IV	≤ 5	≥ 2	≥ 50%	Pembrolizumab	First-line	No	No	No	No	No	No	No	PD	3.97*	25.4667
No.17	76	Female	Smoker	≥ 25	Yes (Levofloxacin)	1	Adenocarcinoma	IV	≤ 5	≥ 2	≥ 50%	Pembrolizumab	First-line	No	No	No	No	No	No	No	PD	2.07*	24.97
No.18	80	Female	Non-smoker	< 25	No	1	Adenocarcinoma	IV	> 5	≥ 2	< 1%	Atezolizumab	Third-line	No	No	No	No	No	No	No	PD	3.23*	3.8*
No.19	70	Male	Smoker	< 25	No	0	Squamous-cell carcinoma	III	> 5	< 2	< 1%	Nivolumab	Second-line	Yes (grade 1)	No	No	Yes (grade 1)	Yes (grade 1)	No	No	PD	3.97*	11.43*
No.20	54	Male	Smoker	< 25	Yes (Levofloxacin)	1	Poorly differentiated carcinoma	IV	> 5	≥ 2	≥ 50%	Pembrolizumab	First-line	No	No	No	No	No	No	No	PD	5.47*	5.5*
No.21	57	Female	Smoker	NA	No	1	Squamous-cell carcinoma	IV	> 5	≥ 2	≥ 50%	Pembrolizumab	First-line	No	No	No	No	No	No	No	PD	1.8*	9.8*
No.22	55	Male	Smoker	< 25	No	1	Adenocarcinoma	IV	> 5	≥ 2	≥ 50%	Pembrolizumab	First-line	No	No	No	No	No	No	No	PD	5.87*	20.73*
No.23	71	Male	Smoker	< 25	No	1	Poorly differentiated carcinoma	IV	> 5	< 2	1%-49%	Nivolumab	Second-line	No	No	No	No	No	No	No	PD	2*	6.33*
No.24	58	Female	Smoker	< 25	No	1	Squamous-cell carcinoma	IV	> 5	≥ 2	≥ 50%	Pembrolizumab	First-line	Yes (grade 1)	No	Yes (grade 1)	No	No	No	No	PD	2.83*	19.1*
No.25	70	Male	Smoker	< 25	No	1	Adenocarcinoma	IV	≤ 5	≥ 2	1%-49%	Nivolumab	Second-line	Yes (grade 1)	No	No	No	Yes (grade 1)	No	No	CB	6.63*	22.7
No.26	72	Male	Smoker	< 25	No	0	Poorly differentiated carcinoma	IV	> 5	≥ 2	≥ 50%	Pembrolizumab	First-line	No	No	No	No	No	No	No	PD	0.6*	0.63*
No.27	80	Female	Non-smoker	≥ 25	No	0	Adenocarcinoma	IV	> 5	≥ 2	≥ 50%	Pembrolizumab	First-line	No	No	No	No	No	No	No	PD	1.47*	2.2*
No.28	56	Male	Non-smoker	< 25	No	1	Squamous-cell carcinoma	IV	> 5	≥ 2	< 1%	Nivolumab	Second-line	No	No	No	No	No	No	No	PD	3.8*	9.27*
No.29	65	Male	Non-smoker	< 25	No	1	Large-cell lung carcinoma	IV	≤ 5	≥ 2	1%-49%	Nivolumab	Second-line	No	No	No	No	No	No	No	CB	13.23*	17.33*
No.30	68	Male	Non-smoker	< 25	Yes (Cephalexin)	1	Adenocarcinoma	IV	≤ 5	≥ 2	≥ 50%	Pembrolizumab	First-line	No	No	No	No	No	No	No	PD	0.67*	1.03*
No.31	68	Male	Smoker	≥ 25	No	1	Adenocarcinoma	IV	≤ 5	≥ 2	≥ 50%	Pembrolizumab	First-line	Yes (grade 1)	No	Yes (grade 1)	Yes (grade 1)	Yes (grade 1)	No	No	CB	24.0667	24.0667
No.32	74	Male	Non-smoker	< 25	Yes (Cephalexin)	1	Squamous-cell carcinoma	IV	> 5	≥ 2	≥ 50%	Pembrolizumab	First-line	Yes (grade 1)	Yes (grade 1)	Yes (grade 1)	Yes (grade 1)	No	Yes (grade 1)	No	CB	24.3	24.3
No.33	78	Male	Smoker	≥ 25	No	1	Squamous-cell carcinoma	IV	> 5	≥ 2	< 1%	Nivolumab	Second-line	Yes (grade 2)	Yes (grade 2)	No	No	No	No	No	PD	1.47*	1.8*
No.34	56	Male	Smoker	≥ 25	No	1	Adenocarcinoma	IV	> 5	< 2	< 1%	Atezolizumab	Second-line	No	No	No	No	No	No	No	PD	2.07*	5.83*
No.35	59	Male	Smoker	≥ 25	Yes (Levofloxacin)	1	Adenocarcinoma	IV	> 5	≥ 2	≥ 50%	Pembrolizumab	First-line	No	No	No	No	No	No	No	CB	10.67*	20.3
No.36	62	Female	Non-smoker	NA	No	1	Adenocarcinoma	IV	> 5	< 2	< 1%	Atezolizumab	Third-line	No	No	No	No	No	No	No	PD	3.63*	3.63*
No.37	67	Female	Smoker	< 25	No	1	Adenocarcinoma	IV	> 5	≥ 2	≥ 50%	Pembrolizumab	First-line	No	No	No	No	No	No	No	PD	5.1*	13.2*
No.38	75	Female	Smoker	≥ 25	No	0	Poorly differentiated carcinoma	IV	≤ 5	≥ 2	< 1%	Atezolizumab	Second-line	Yes (grade 2)	Yes (grade 2)	No	No	No	No	No	PD	2.3*	5.04*
No.39	58	Female	Smoker	< 25	Yes (NA)	1	Adenocarcinoma	IV	> 5	≥ 2	≥ 50%	Pembrolizumab	First-line	No	No	No	No	No	No	No	PD	2.53*	2.73*
No.40	62	Male	Smoker	NA	No	1	Adenocarcinoma	IV	> 5	≥ 2	≥ 50%	Pembrolizumab	First-line	No	No	No	No	No	No	No	PD	5.37*	19.87*
No.41	69	Male	Smoker	≥ 25	No	0	Squamous-cell carcinoma	IV	> 5	≥ 2	≥ 50%	Pembrolizumab	First-line	No	No	No	No	No	No	No	CB	8.97*	15.8*
No.42	64	Female	Smoker	≥ 25	No	2	Squamous-cell carcinoma	IV	> 5	< 2	< 1%	Nivolumab	Second-line	Yes (grade 2)	Yes (grade 2)	No	No	No	No	No	PD	2.5*	10.83*
No.43	72	Female	Non-smoker	< 25	No	0	Squamous-cell carcinoma	IV	> 5	≥ 2	≥ 50%	Pembrolizumab	First-line	Yes (grade 1)	No	No	No	Yes (grade 1)	No	No	CB	11.53*	13.57*
No.44	53	Male	Non-smoker	< 25	Yes (Levofloxacin)	1	Squamous-cell carcinoma	IV	> 5	≥ 2	1%-49%	Nivolumab	Second-line	No	No	No	No	No	No	No	PD	1.97*	2.67*
No.45	74	Male	Non-smoker	≥ 25	No	0	Squamous-cell carcinoma	IV	≤ 5	< 2	≥ 50%	Atezolizumab	Second-line	Yes (grade 2)	Yes (grade 2)	No	No	No	No	No	CB	8.37*	13.97*
No.46	84	Male	Non-smoker	≥ 25	No	0	Squamous-cell carcinoma	III	> 5	< 2	≥ 50%	Pembrolizumab	First-line	Yes (grade 2)	Yes (grade 2)	No	No	No	Yes (grade 2)	No	CB	8.43*	18.77
No.47	57	Male	Smoker	≥ 25	Yes (Amoxicillin/ Clavulanate)	0	Adenocarcinoma	IV	> 5	≥ 2	≥ 50%	Pembrolizumab	First-line	Yes (grade 3)	Yes (grade 2)	Yes (grade 3)	No	No	No	No	CB	15.87	15.87
No.48	75	Male	Non-smoker	≥ 25	No	0	Adenocarcinoma	III	> 5	< 2	≥ 50%	Pembrolizumab	First-line	Yes (grade 2)	Yes (grade 2)	Yes (grade 1)	No	Yes (grade 1)	Yes (grade 2)	No	CB	15.2*	19.4
No.49	87	Male	Non-smoker	NA	No	1	Adenocarcinoma	IV	> 5	< 2	≥ 50%	Pembrolizumab	First-line	Yes (grade 2)	No	Yes (grade 1)	Yes (grade 2)	Yes (grade 1)	No	No	CB	13.3	16.07*
No.50	67	Male	Smoker	< 25	No	2	Squamous-cell carcinoma	III	> 5	< 2	≥ 50%	Pembrolizumab	First-line	No	No	No	No	No	No	No	CB	8.2*	9.27*
No.51	60	Male	Smoker	≥ 25	Yes (Levofloxacin)	1	Adenocarcinoma	IV	> 5	≥ 2	≥ 50%	Pembrolizumab	First-line	No	No	No	No	No	No	No	CB	11.27*	11.27*
No.52	71	Male	Smoker	< 25	No	1	Squamous-cell carcinoma	III	> 5	< 2	≥ 50%	Pembrolizumab	First-line	No	No	No	No	No	No	No	PD	1.43*	3.97*
No.53	82	Male	Non-smoker	< 25	No	1	Adenocarcinoma	III	> 5	< 2	≥ 50%	Pembrolizumab	First-line	No	No	No	No	No	No	No	PD	4.5*	9.37*
No.54	54	Male	Smoker	≥ 25	No	0	Squamous-cell carcinoma	IV	> 5	< 2	1%-49%	Nivolumab	Second-line	No	No	No	No	No	No	No	CB	9.8*	16.6
No.55	66	Male	Non-smoker	< 25	Yes (Amoxicillin/ Clavulanate)	2	Adenocarcinoma	IV	> 5	≥ 2	< 1%	Atezolizumab	Second-line	No	No	No	No	No	No	No	PD	2.1*	2.73*
No.56	58	Male	Smoker	≥ 25	No	1	Adenocarcinoma	IV	> 5	< 2	< 1%	Atezolizumab	Second-line	No	No	No	No	No	No	No	PD	0.83*	8.7*
No.57	54	Female	Smoker	< 25	No	1	Squamous-cell carcinoma	IV	≤ 5	< 2	< 1%	Nivolumab	Second-line	No	No	No	No	No	No	No	CB	15.5*	19.5667
No.58	73	Male	Smoker	≥ 25	No	1	Squamous-cell carcinoma	IV	> 5	≥ 2	< 1%	Nivolumab	Second-line	No	No	No	No	No	No	No	CB	9.13*	19.5333
No.59	63	Female	Non-smoker	≥ 25	Yes (Amoxicillin/ Clavulanate)	2	Adenocarcinoma	IV	> 5	≥ 2	≥ 50%	Pembrolizumab	First-line	No	No	No	No	No	No	No	PD	0.6*	16.07
No.60	78	Male	Smoker	≥ 25	No	1	Large-cell lung carcinoma	III	≤ 5	< 2	≥ 50%	Pembrolizumab	First-line	No	No	No	No	No	No	No	CB	18.4333	18.4333
No.61	73	Male	Non-smoker	< 25	No	1	Squamous-cell carcinoma	IV	> 5	≥ 2	NA	Atezolizumab	Second-line	Yes (grade 2)	Yes (grade 1)	Yes (grade 1)	No	No	Yes (grade 2)	No	CB	15.63	15.63
No.62	72	Male	Smoker	≥ 25	Yes (Cephalexin)	1	Squamous-cell carcinoma	III	> 5	< 2	< 1%	Nivolumab	Second-line	No	No	No	No	No	No	No	CB	12.87*	16.3667
No.63	61	Male	Smoker	≥ 25	Yes (Amoxicillin/ Clavulanate)	0	Adenocarcinoma	IV	> 5	≥ 2	≥ 50%	Pembrolizumab	First-line	Yes (grade 2)	Yes (grade 2)	No	No	No	No	Yes (grade 2)	CB	14.27	14.27
No.64	54	Male	Non-smoker	≥ 25	No	0	Squamous-cell carcinoma	IV	≤ 5	< 2	≥ 50%	Pembrolizumab	First-line	Yes (grade 2)	No	Yes (grade 2)	Yes (grade 1)	Yes (grade 2)	No	No	CB	13.83	13.83
No.65	52	Male	Smoker	≥ 25	No	0	Adenocarcinoma	IV	> 5	≥ 2	≥ 50%	Pembrolizumab	First-line	Yes (grade 2)	No	No	Yes (grade 2)	No	No	No	CB	15.13	15.13
No.66	67	Female	Smoker	≥ 25	No	1	Adenocarcinoma	IV	> 5	≥ 2	≥ 50%	Pembrolizumab	First-line	Yes (grade 1)	No	Yes (grade 1)	No	No	No	No	CB	12.6*	16.3
No.67	84	Female	Non-smoker	≥ 25	No	0	Poorly differentiated carcinoma	IV	≤ 5	< 2	≥ 50%	Pembrolizumab	First-line	Yes (grade 2)	No	No	No	No	Yes (grade 2)	No	CB	17.6333	17.6333
No.68	63	Male	Smoker	< 25	Yes (Levofloxacin)	1	Adenocarcinoma	IV	> 5	≥ 2	≥ 50%	Pembrolizumab	First-line	No	No	No	No	No	No	No	CB	17.9333	17.9333
No.69	69	Male	Smoker	< 25	No	2	Poorly differentiated carcinoma	IV	≤ 5	≥ 2	≥ 50%	Pembrolizumab	First-line	No	No	No	No	No	No	No	PD	4.87*	5*
NSCLC: non-small cell lung cancer; Non-smoker: never smoker + former smoker; ICB: immune checkpoint blockade; ECOG: Eastern cooperative oncology group; NA: Not available; TPS: Tumor proportion score; PD: Progression disease; CB: Clinical benefit.
*Progression or death during follow-up.
