# Supplementary material for: Analysis of the Gut Microbiota: An Emerging Source of Biomarkers for Immune Checkpoint Blockade Therapy in Non-Small Cell Lung Cancer
Source: Cancers (Basel). 2021 May 21;13(11):2514. doi: 10.3390/cancers13112514 (PMC8196639; doi:10.3390/cancers13112514)
Supplement: Supplementary file 1 [file cancers-13-02514-s001.zip › Table S2.xlsx]

## Sheet: Table S2
Table S2. Univariate analysis based on clinico-pathological characteristics.
	Progression-free survival				Overall survival
	Hazard ratio	95% confidence interval	p-value		Hazard ratio	95% confidence interval	p-value
Age	1.081	0.637-1.836	0.772		0.969	0.525-1.788	0.92
≤ 66 vs. > 66
Gender	0.544	0.307-0.962	0.036		0.8	0.414-1.547	0.508
Male vs. Female
Smoking status	1.174	0.665-2.103	0.59		0.771	0.403-1.477	0.434
Smoker vs. Non-smoker
Body mass index	1.439	0.829-2.497	0.196		2.132	1.083-4.197	0.028
< 25 vs. ≥ 25
Antibiotics previous	1.013	0.534-1.923	0.968		0.89	0.411-1.928	0.768
Yes vs. No
ECOG performance status	0.37	0.153-0.891	0.027		0.414	0.159-1.075	0.07
0-1 vs. ≥ 2
Stage	0.811	0.408-1.611	0.55		0.654	0.275-1.577	0.338
III vs. IV
Histology	1.085	0.638-1.847	0.763		0.897	0.483-1.666	0.731
Adenocarcinoma vs. Non-adenocarcinoma
PD-L1	0.534	0.306-0.933	0.028		0.59	0.310-1.123	0.108
Positive (TPS ≥ 1%) vs. Negative (TPS < 1%)
Immunotherapy	0.635	0.373-1.080	0.094		0.635	0.343-1.176	0.149
1st line vs. Non-1st line
Tumor size	0.729	0.383-1.386	0.335		0.431	0.180-1.030	0.058
≤ 5cm vs. > 5cm
Number of metastatic sites	0.78	0.451-1.347	0.373		0.768	0.406-1.451	0.416
< 2 vs. ≥ 2
Non-smoker: never smoker + former smoker; ECOG: Eastern cooperative oncology group; TPS: tumor proportion score. P-values were obtained using the univariate Cox regression method.Bold p-values denote statistical significance at the p < 0.05 level.
