# Supplementary material for: Analysis of the Gut Microbiota: An Emerging Source of Biomarkers for Immune Checkpoint Blockade Therapy in Non-Small Cell Lung Cancer
Source: Cancers (Basel). 2021 May 21;13(11):2514. doi: 10.3390/cancers13112514 (PMC8196639; doi:10.3390/cancers13112514)
Supplement: Supplementary file 1 [file cancers-13-02514-s001.zip › Table S3.xlsx]

## Sheet: Table S3
Table S3. Sequencing information and alpha-diversity indices of 69 advanced NSCLC patients.
Patient ID	Number of sequencing reads	Effective reads after filtering	Chao 1 index	Shannon index	Inverse Simpson index
No.01	62898	39672	87	2.91	10.18
No.02	83118	50889	151	3.7	25.11
No.03	93489	64259	151	3.38	13.76
No.04	77048	48578	141	3.29	12.04
No.05	91071	59660	152	3.59	18.86
No.06	85181	54486	252	4.22	33.99
No.07	87970	54703	129	3.18	12.22
No.08	71733	46918	111	3.43	16.87
No.09	85401	54943	167	3.76	25.06
No.10	233295	176977	231	3.58	12.54
No.11	394857	286698	178	3.1	12.94
No.12	166851	121945	169	3.27	13.97
No.13	178799	136581	150	3.08	11.35
No.14	540654	395132	274	3.71	21.47
No.15	142170	108497	134	3.19	13.87
No.16	143813	107347	84	2.99	11.62
No.17	166669	109529	165	3	8
No.18	114502	77627	170	3.27	8.92
No.19	116334	77483	158	3.35	13.53
No.20	177178	96937	127	2.67	5.52
No.21	141381	91821	170	3.53	17.83
No.22	194053	121416	164	3.46	19.99
No.23	172695	113837	205	3.68	17.75
No.24	161906	104439	89	2.94	11.52
No.25	153128	103521	125	2.42	3.83
No.26	152339	96331	213	3.96	24.48
No.27	208628	134596	177	3.25	10.69
No.28	176970	128261	112	2.66	9.09
No.29	100690	63007	167	3.42	14.21
No.30	151225	91603	167	3.24	12.27
No.31	309256	192561	135	2.99	9.65
No.32	125549	83705	188	3.8	24.1
No.33	191231	127585	196	3.59	18.62
No.34	137709	90203	171	2.74	5.29
No.35	182395	120863	149	3.75	24.93
No.36	168200	126142	165	3.58	21.89
No.37	157715	111471	232	3.86	21.01
No.38	113682	85823	143	3.31	13.42
No.39	153940	113375	167	3.36	14.19
No.40	143434	106425	170	3.52	16.68
No.41	182308	138389	224	3.83	22.15
No.42	182375	140429	263	4.05	27.88
No.43	169653	121915	133	2.89	9.56
No.44	174084	133048	128	2.72	6.18
No.45	148321	107800	184	3.5	14.34
No.46	181177	131335	171	3.53	17.05
No.47	164511	121268	105	2.75	7.64
No.48	125495	74476	192	3.88	30.28
No.49	107257	79511	103	2.79	8.47
No.50	144582	108794	158	3.35	14.25
No.51	121065	93055	129	2.88	6.51
No.52	141493	105732	199	3.73	25.26
No.53	170918	134385	225	3.7	19.54
No.54	161898	120735	246	3.97	25.69
No.55	153693	116603	106	2.81	9.71
No.56	147068	110285	207	3.6	18.27
No.57	145987	112227	244	4.3	41.16
No.58	189713	137939	221	3.96	29.61
No.59	144033	107428	78	3.08	15.8
No.60	159409	121490	194	3.3	13.41
No.61	124180	92096	166	3.44	18.55
No.62	140267	102036	174	3.47	17.59
No.63	131687	94073	176	3.27	12.36
No.64	121998	86767	42	1.78	3.32
No.65	115969	83358	220	4.24	42.93
No.66	116230	82861	150	3.4	14.51
No.67	83839	63151	79	2.12	4.32
No.68	105930	77508	161	3.49	16.37
No.69	89099	61368	177	3.74	22.42
NSCLC: non-small cell lung cancer.
