# Supplementary material for: Analysis of the Gut Microbiota: An Emerging Source of Biomarkers for Immune Checkpoint Blockade Therapy in Non-Small Cell Lung Cancer
Source: Cancers (Basel). 2021 May 21;13(11):2514. doi: 10.3390/cancers13112514 (PMC8196639; doi:10.3390/cancers13112514)
Supplement: Supplementary file 1 [file cancers-13-02514-s001.zip › Table S4.xlsx]

## Sheet: Table S4
Table S4. Correlation analysis between alpha-diversity and clinico-pathological characteristics.
Index	Characteristics
	Age
	≤ 66	> 66	P-value
	median (range)	median (range)
Chao 1	164.5 (42.0-274.0)	170.0 (79.0-252.0)	0.183
Shannon	3.39 (1.78-4.30)	3.40 (2.12-4.22)	0.334
Inverse Simpson	14.2 (3.32-42.93)	14.34 (3.83-33.99)	0.683
	Gender
	Male	Female	P-value
	median (range)	median (range)
Chao 1	167.0 (42.0-274.0)	158.0 (78.0-263.0)	0.175
Shannon	3.46 (1.78-4.24)	3.27 (2.21-4.30)	0.315
Inverse Simpson	16.37 (3.32-42.93)	13.695 (4.32-41.16)	0.412
	Smoking status
	Smoker	Non-smoker	P-value
	median (range)	median (range)
Chao 1	169.0 (84.0-274.0)	165.5 (42.0-225.0)	0.075
Shannon	3.43 (2.42-4.30)	3.26 (1.78-3.88)	0.074
Inverse Simpson	14.51 (3.83-42.93)	14.04 (3.32-30.28)	0.127
	Body mass index
	< 25	≥ 25	P-value
	median (range)	median (range)
Chao 1	166.0 (84.0-274.0)	170.0 (42.0-263.0)	0.89
Shannon	3.44 (2.42-4.30)	3.305 (1.78-4.24)	0.499
Inverse Simpson	14.25 (3.83-41.16)	13.92 (3.32-42.93)	0.573
	Antibiotics previous
	Yes	No	P-value
	median (range)	median (range)
Chao 1	155.0 (78.0-188.0)	170.0 (42.0-274.0)	0.04
Shannon	3.215 (2.67-3.80)	3.44 (1.78-4.30)	0.074
Inverse Simpson	13.115 (5.52-25.06)	14.51 (3.32-42.93)	0.143
	ECOG performance status
	0-1	≥ 2	P-value
	median (range)	median (range)
Chao 1	167.0 (42.0-274.0)	162.5 (78.0-263.0)	0.692
Shannon	3.40 (1.78-4.30)	3.545 (2.81-4.05)	0.511
Inverse Simpson	14.19 (3.32-42.93)	19.11 (9.71-27.88)	0.213
	Stage
	III	IV	P-value
	median (range)	median (range)
Chao 1	164.5 (129.0-225.0)	167.0 (42.0-274.0)	0.982
Shannon	3.50 (3.18-3.88)	3.38 (1.78-4.30)	0.519
Inverse Simpson	17.32 (12.04-30.28)	14.19 (3.32-42.93)	0.416
	Histology
	Adenocarcinoma	Non-adenocarcinoma	P-value
	median (range)	median (range)
Chao 1	164.5 (78.0-232.0)	170.0 (42.0-274.0)	0.166
Shannon	3.315 (2.42-4.24)	3.44 (1.78-4.30)	0.29
Inverse Simpson	14.03 (3.83-42.93)	14.34 (3.32-41.16)	0.086
	Expression of PD-L1
	Positive	Negative	P-value
	median (range)	median (range)
Chao 1	166.0 (42.0-252.0)	170.0 (106.0-274.0)	0.262
Shannon	3.355 (1.78-4.24)	3.43 (2.66-4.30)	0.503
Inverse Simpson	14.23 (3.32-42.93)	13.87 (5.29-41.16)	0.525
	line of Immunotherapy
	1st line	Non-1st line	P-value
	median (range)	median (range)
Chao 1	165.0 (42.0-232.0)	167.0 (106.0-274.0)	0.156
Shannon	3.30 (1.78-4,24)	3.455 (2.42-4.30)	0.234
Inverse Simpson	14.19 (3.32-42.93)	15.60 (3.83-41,16)	0.33
	Tumor size
	≤ 5 cm	> 5 cm	P-value
	median (range)	median (range)
Chao 1	157.5 (42-274)	167.0 (78-263)	0.227
Shannon	3.27 (1.78-4.30)	3.46 (2.66-4.24)	0.113
Inverse Simpson	12.84 (3.32-41.16)	16.37 (5.29-42.93)	0.071
	Number of metastatic sites
	<2	≥2	P-value
	median (range)	median (range)
Chao 1	165.5 (78.0-252.0)	171.0 (42.0-274.0)	0.143
Shannon	3.37 (2.42-4.24)	3.50 (1.78-4.30)	0.363
Inverse Simpson	14.08 (3.83-42.93)	17.05 (3.32-41.16)	0.307
Non-smoker: never smoker + former smoker; ECOG: eastern cooperative oncology group.
Statistical analysis was performed using the Mann-Whitney U rank sum test. Bold p-values denote statistical significance at the p < 0.05 level.
